# Supplementary material for: Nano metal oxides as efficient catalysts for selective synthesis of 1-methoxy-2-propanol from methanol and propylene oxide
Source: Royal Society of Chemistry journal article supplement (doi:10.1039/c7ra13119d), 2018-01-01
Supplement: c7ra13119d1.pdf [file c7ra13119d1.pdf]

## Supporting information

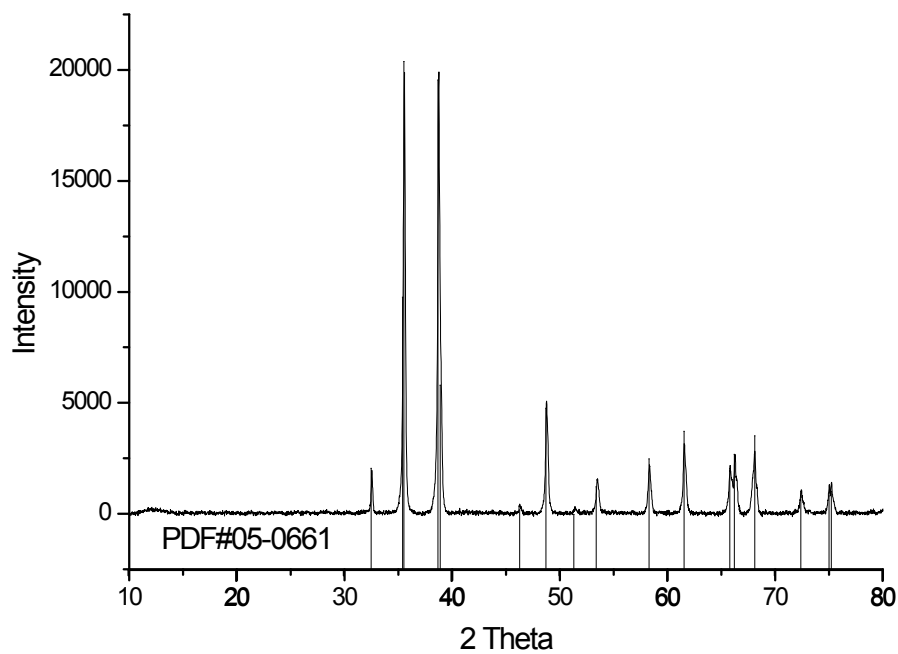

Fig. S11 XRD pattern of CuO

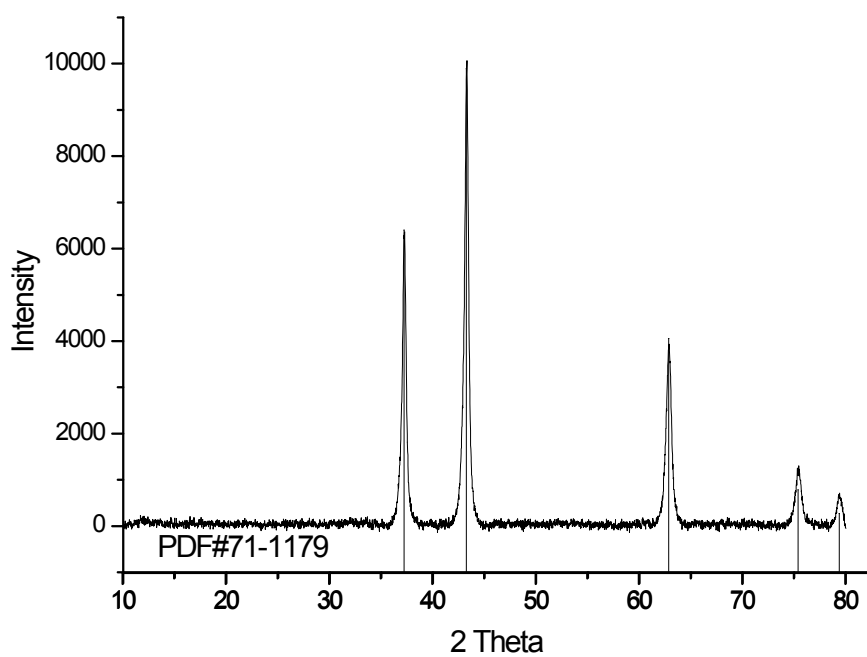

Fig. S12 XRD pattern of NiO

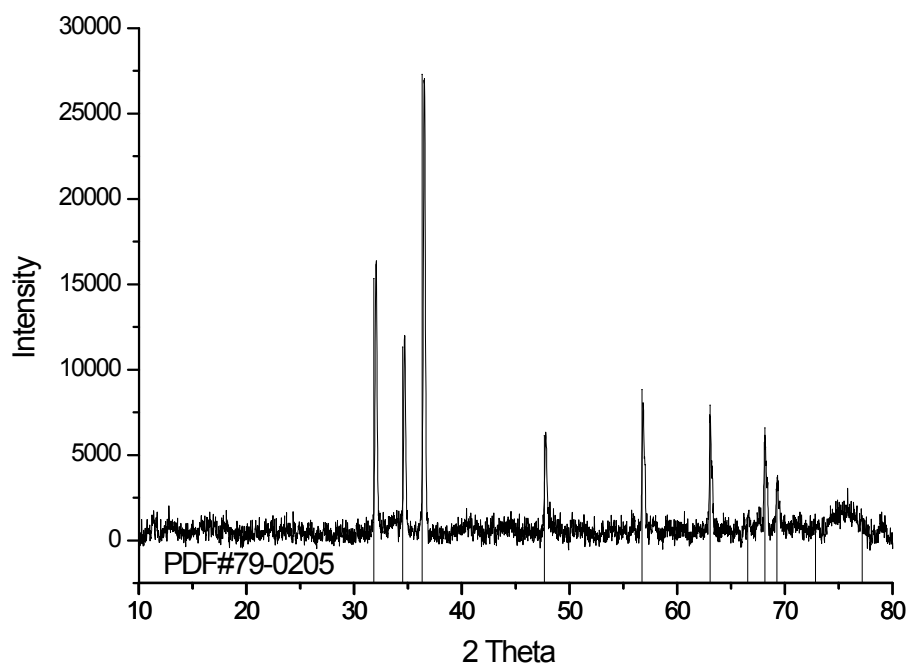

Fig. S13 XRD pattern of ZnO

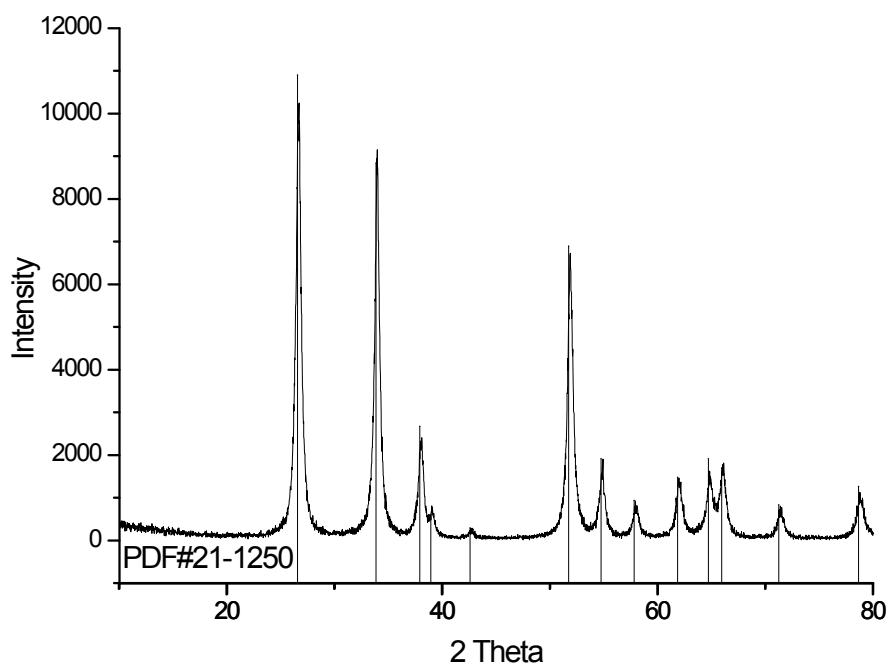

Fig. S14 XRD pattern of SnO<sub>2</sub>

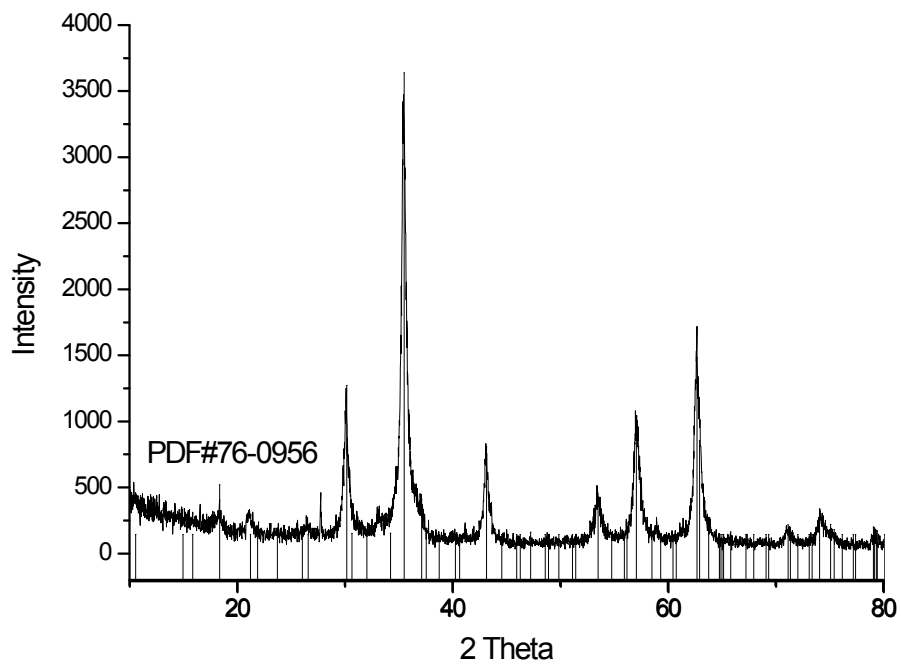

Fig. S15 XRD pattern of Fe<sub>3</sub>O<sub>4</sub>

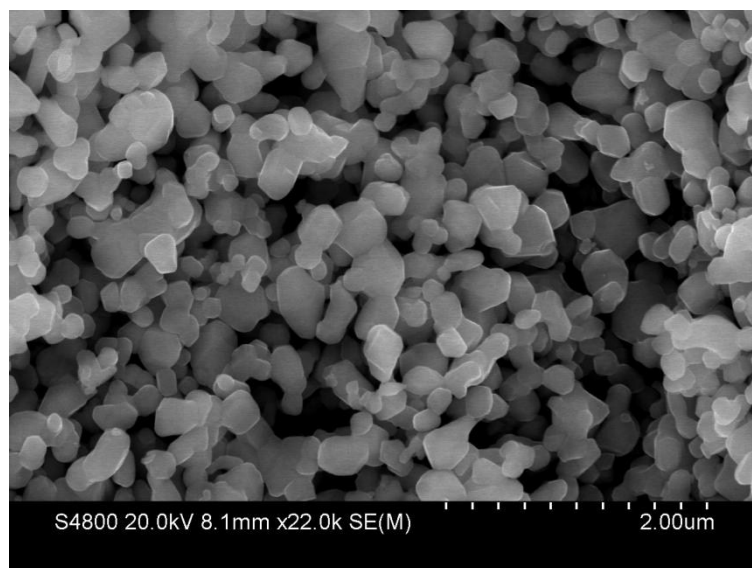

Fig. S16 SEM image of CuO

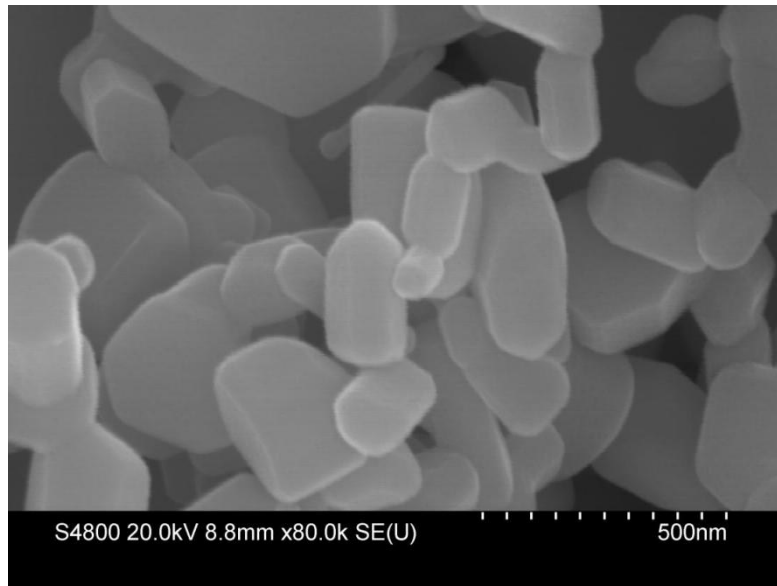

Fig. SI7 SEM image of ZnO

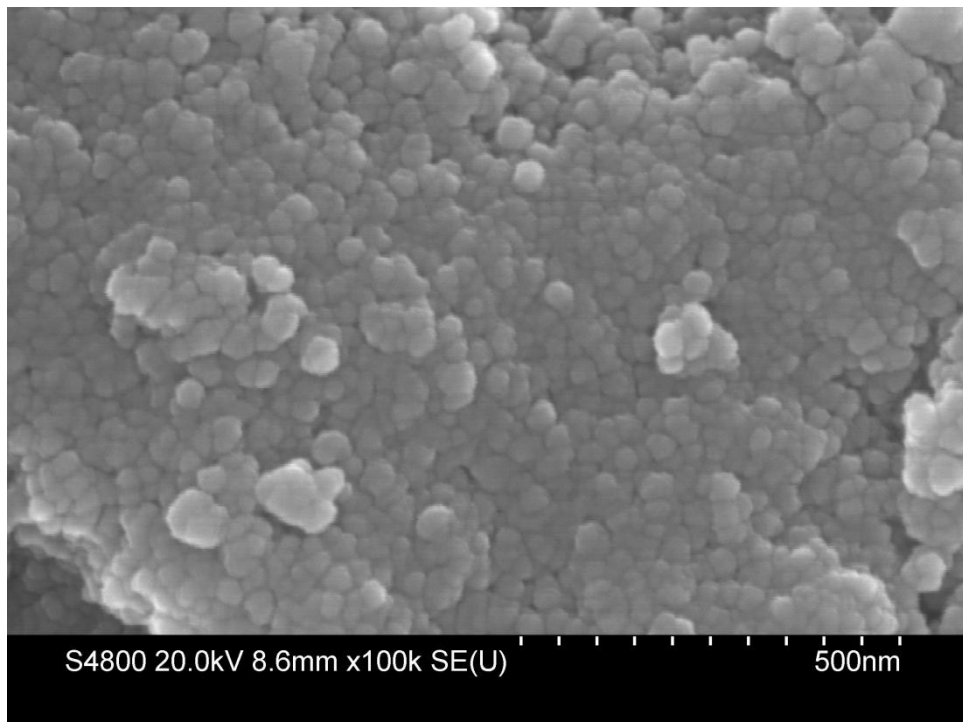

Fig. SI8 SEM image of SnO<sub>2</sub>

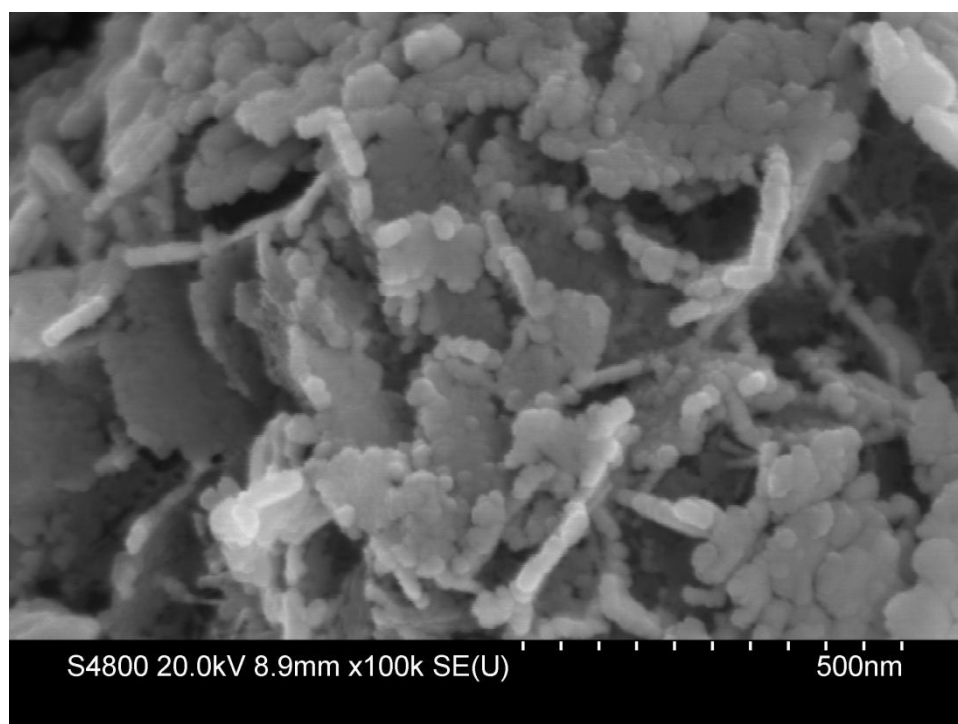

Fig. SI9 SEM image of NiO

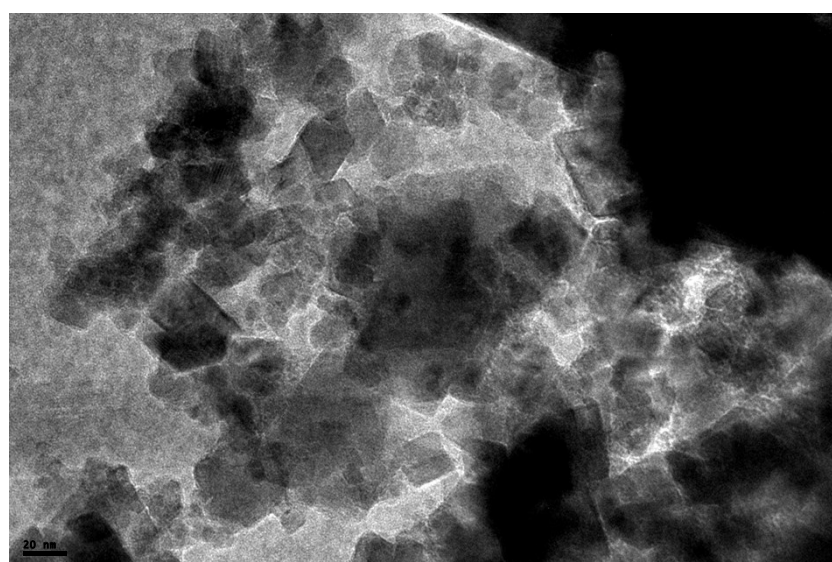

Fig. SI10 TEM image of Fe<sub>3</sub>O<sub>4</sub>
